# Supplementary material
Source: PubMed Central journal article supplement (PMC5567521)
Supplement: 12264_2017_97_MOESM1_ESM.pdf [file 12264_2017_97_MOESM1_ESM.pdf]

## Electronic Supplementary Material

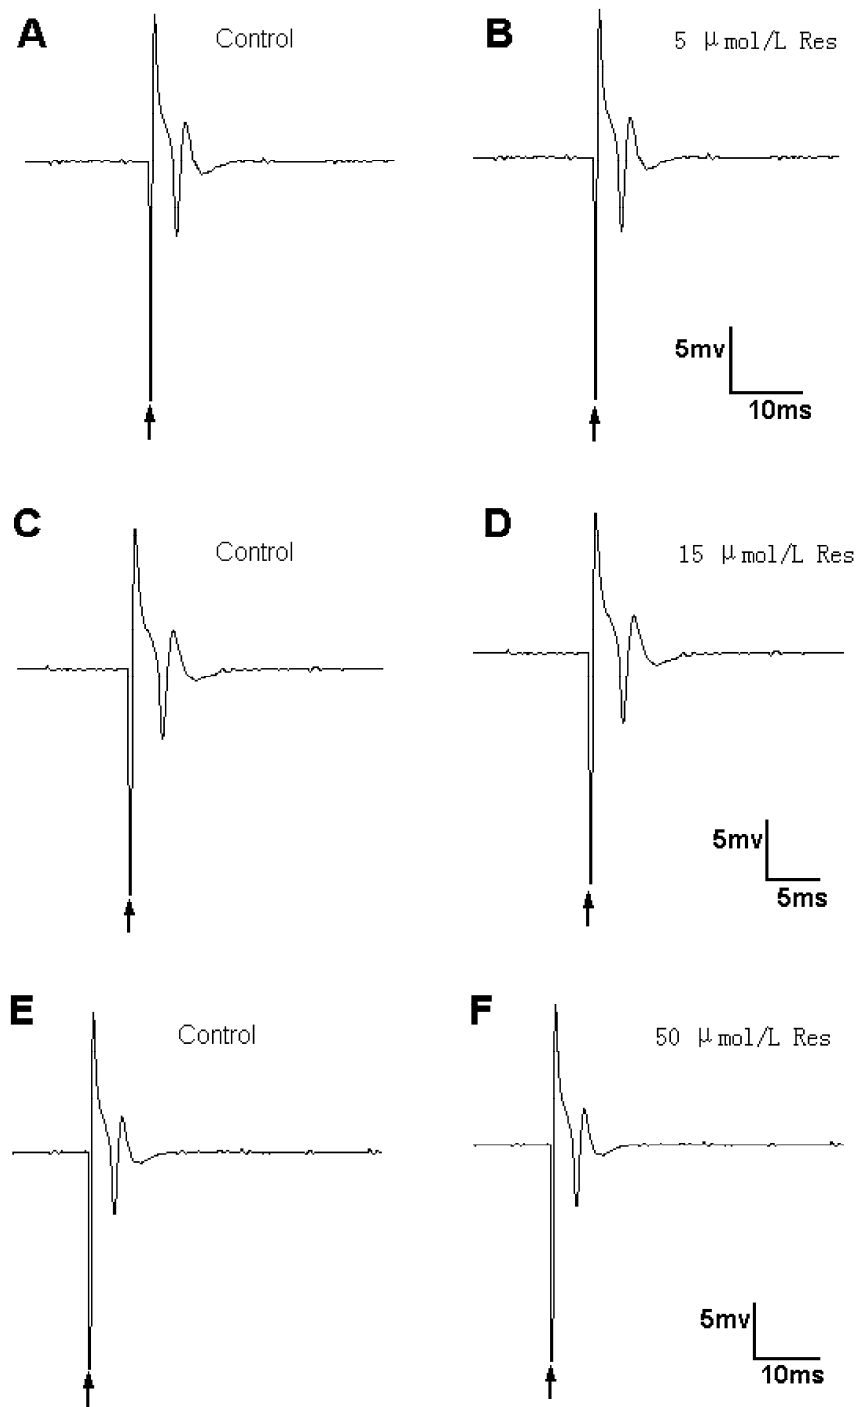

**Figure S1.** Typical traces showing that different doses of resveratrol (Res) have no effect on the amplitude of population spikes in the control group.

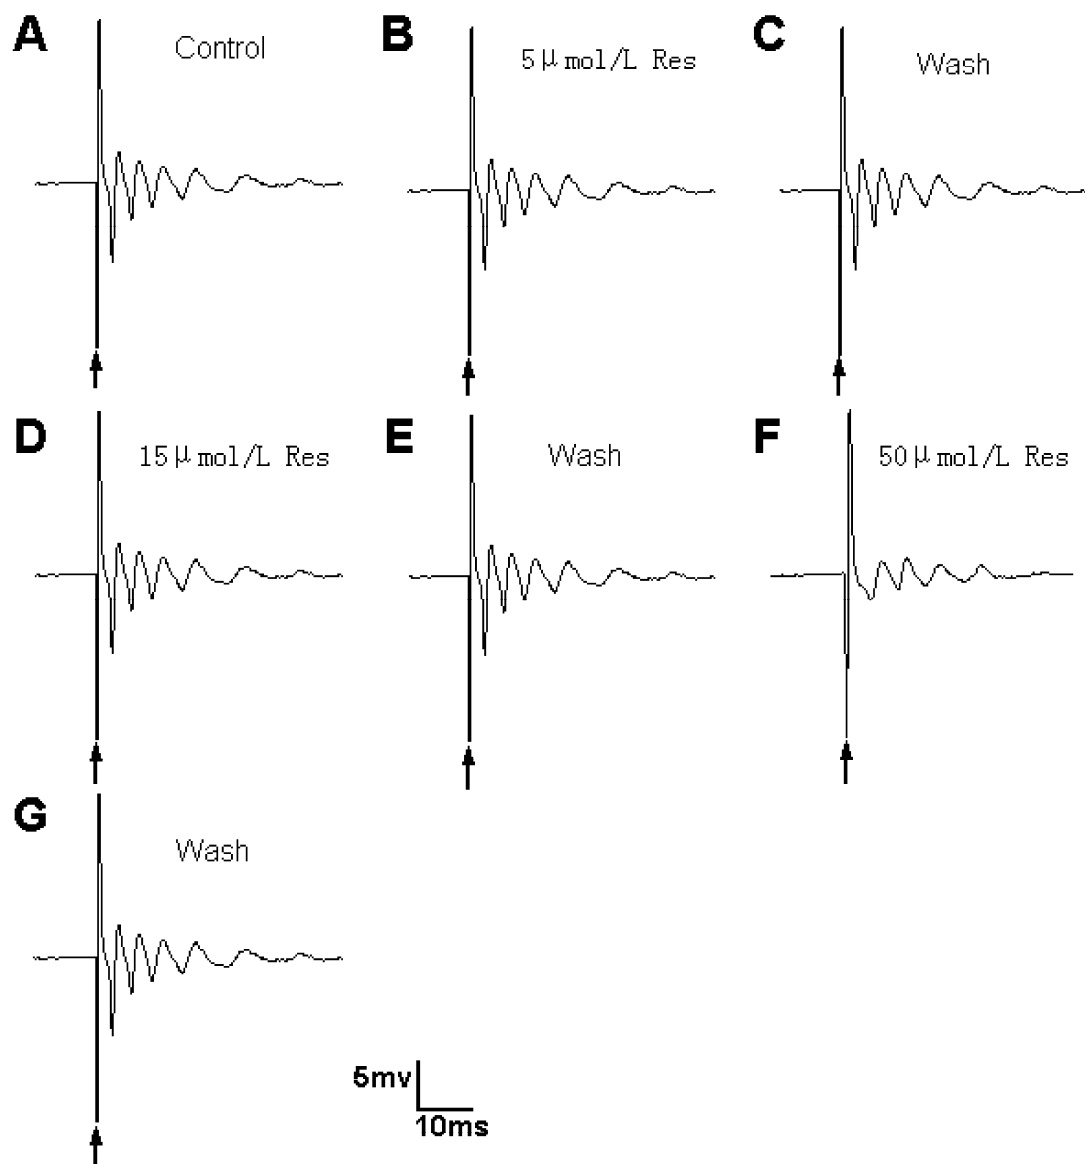

**Figure S2.** Typical traces showing the effect of different resveratrol doses on epileptiform discharges evoked by KA in the rat hippocampal CA1 region.

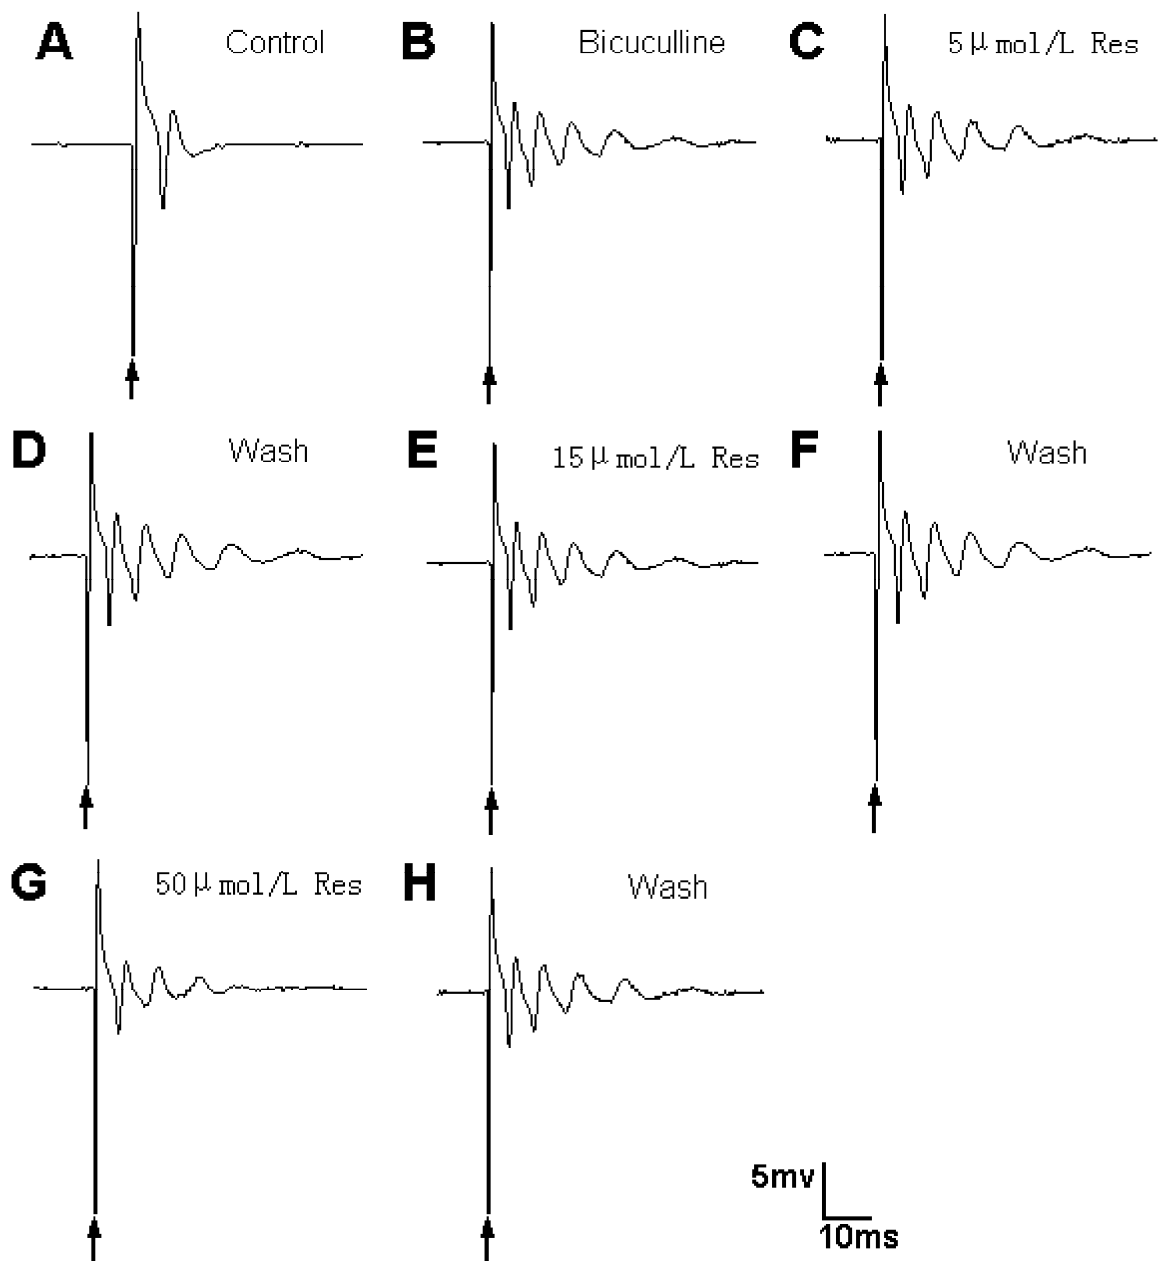

**Figure S3.** Typical traces showing the effects of different doses of resveratrol (Res) on epileptiform discharges evoked by bicuculline in the hippocampal CA1 region.
